# Supplementary material for: Development and performance of a high-resolution surface wave and storm surge forecast model: application to a large lake
Source: Copernicus journal article supplement (doi:10.5194/gmd-17-7751-2024), 2024-11-06
Supplement: Supplementary file 1 [file gmd-17-7751-2024-supplement.pdf]

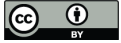

*Supplement of*

## **Development and performance of a high-resolution surface wave and storm surge forecast model: application to a large lake**

**Laura L. Swatridge et al.**

*Correspondence to:* Laura L. Swatridge (l.swatridge@queensu.ca)

The copyright of individual parts of the supplement might differ from the article licence.

## Supplementary Information

**Table S1:** Descriptions of available near-real time data that is automatically downloaded as part of the Coastlines-LO workflow, including the data type, web locations, and the method of data delivery for each location.

| <b>Data Type</b>   | <b>Delivery Method</b>                        | <b>Data Location</b>                                                                                                                                                                                                    | <b>Point Name</b>                                                          |
|--------------------|-----------------------------------------------|-------------------------------------------------------------------------------------------------------------------------------------------------------------------------------------------------------------------------|----------------------------------------------------------------------------|
| Water Levels (US)  | NOAA CO-OPS data API                          | <a href="https://tidesandcurrents.noaa.gov/stations.html?type=Water+Levels#Great%20Lakes%20-%20Lake%20Ontario">https://tidesandcurrents.noaa.gov/stations.html?type=Water+Levels#Great%20Lakes%20-%20Lake%20Ontario</a> | Cape Vincent, Oswego, Rochester, Olcott Harbour                            |
| Water Levels (CAN) | Canadian Hydrographic Service Web service API | <a href="https://tides.gc.ca/en/stations">https://tides.gc.ca/en/stations</a>                                                                                                                                           | Burlington, Toronto, Cobourg, Kingston, Port Wellar                        |
| Wave/Wind          | Python Web Scraping                           | <a href="https://www.ndbc.noaa.gov/data/realtime2">https://www.ndbc.noaa.gov/data/realtime2</a>                                                                                                                         | NW Lake Ontario, East Lake Ontario, Prince Edward Point, West Lake Ontario |

**Table S2:** Approximate runtimes for model resolution configurations using a 16-cores of a XEON 2.50 GHz processor workstation with 64 GB RAM, to simulate 48 hrs of model time. Note that the simulation run times are approximation, as this value changes depending on the conditions being simulated, which impacts how long it takes for the wave model to converge on a solution to the required confidence criteria..

| Configuration | Flow Resolution | Flow grid cells | Wave Resolution | Wave grid cells | Runtime  |
|---------------|-----------------|-----------------|-----------------|-----------------|----------|
| 1             | 250m – 450m     | 333216          | 350m - 600m     | 169400          | ~4 hrs   |
| 2             | 250m – 450m     | 333216          | 250m – 450m     | 333216          | ~7 hrs   |
| 3             | 250m-450m       | 333216          | No Waves        | N/A             | ~0.5 hrs |

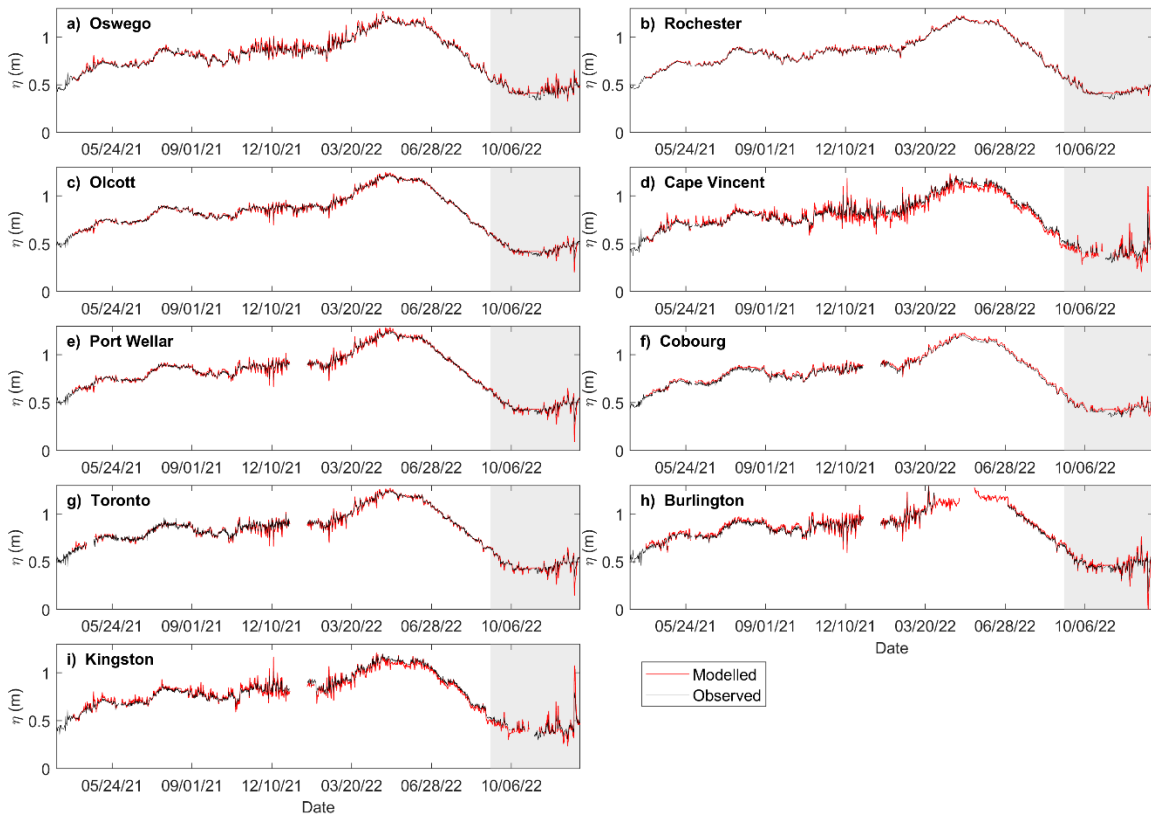

**Figure S1:** Time series of compiled model results (adjusted after each forecast to the correct datum) and observed total water levels at all water level observation points between May 2021 – December 2022. The highlighted area indicates the time-period examined in greater detail in Figure 3.

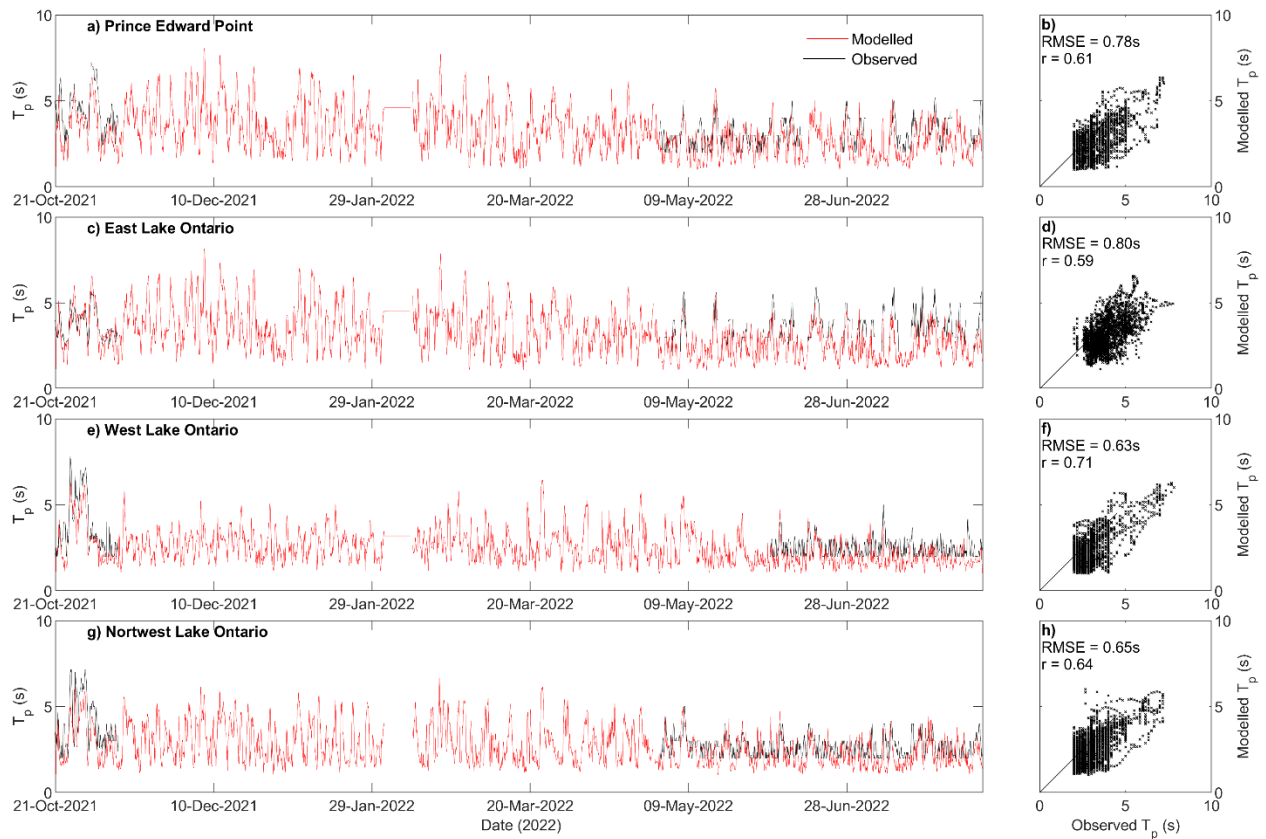

**Figure S2:** Time series of observed (black) and modelled (red) peak wave period over the duration that the buoys were in the lake (September -December 2022) with corresponding error scatter plots at the location of the 4 buoys. Note that the model was offline and are unavailable between February 9 – 27, 2022 due to a change of service for the meteorological inputs.

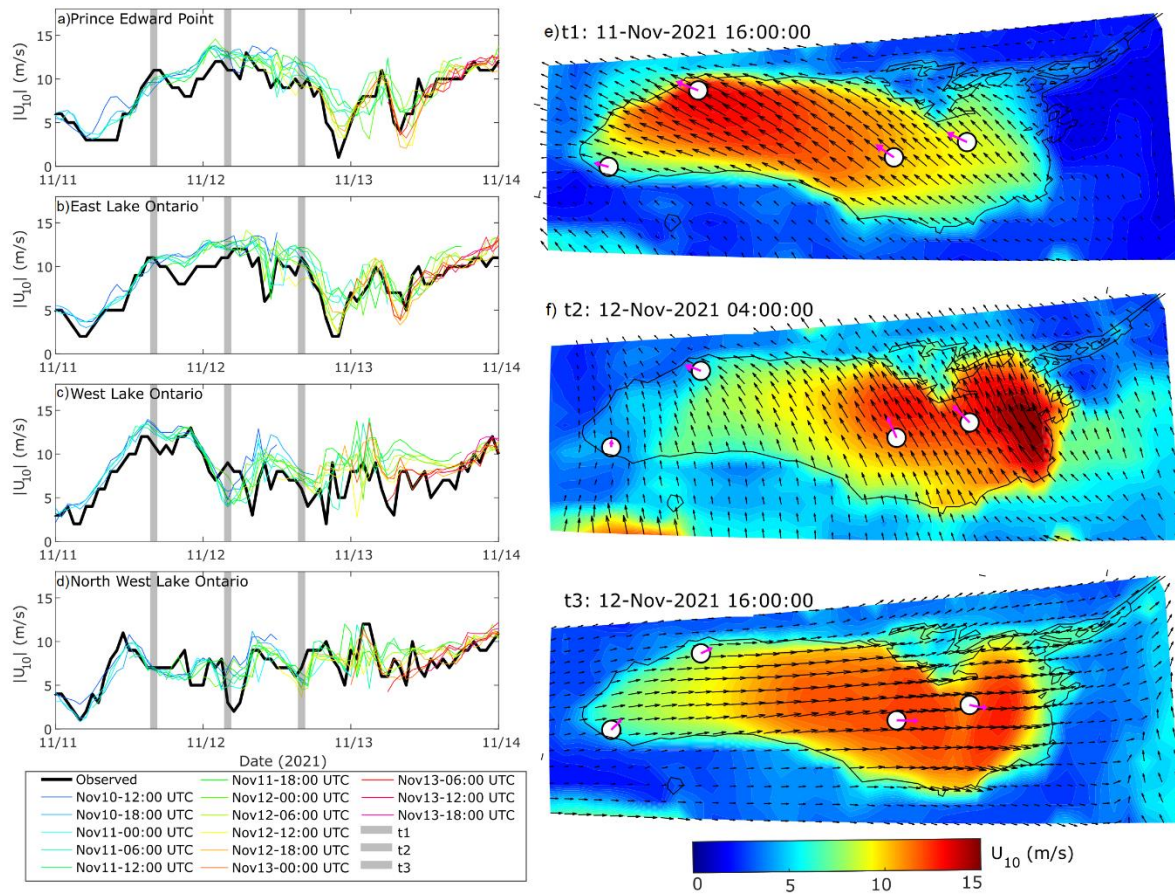

**Figure S3:** Time series of observed wind speeds compared to HRDPS forecasts at wave buoy locations between November 11-14, 2021 (left) and maps of HRDPS wind forecasts shown at select times with every 5<sup>th</sup> vector plotted for clarity (right). Vectors of observed data are plotted in magenta at the location of the buoys.

|                   | <b>Coastlines - LO</b> | <b>GLCFS</b>                   |
|-------------------|------------------------|--------------------------------|
| Model             | Delft3D-SWAN           | FVCOM                          |
| Wind Input        | HRDPS (2.5 km)         | HRRR (2km)                     |
| Layers            | 1 (depth averaged)     | 30 layers                      |
| Grid Resolution   | 350-750 m              | 30 m – 2km                     |
| Wave Coupling     | Yes                    | Not yet.                       |
| Inflows/ outflows | No                     | Yes                            |
| Forecast Length   | 48 hrs                 | 120 hrs                        |
| Time Step         | 120 seconds            | 10 seconds                     |
| Processes         | Circulation, waves     | Ice, temperature, circulation, |
| Cores             | 16                     | High performance computer      |

**Table S3:** Overview of modelling approach differences between Coastlines-LO and the GLCFS. Details for the setup of the GLCFS are sourced from the NOAA’s GLERL webpage (<https://www.glerl.noaa.gov/res/glcfs/>), and various model validation studies (Kelley et al., 2018; Peng et al., 2019).

| Location     | Coastlines-LO RMSE | GLCFS RMSE (m) | Coastlines-LO r | GLCFS r |
|--------------|--------------------|----------------|-----------------|---------|
| Oswego       | 0.02               | 0.03           | 0.63            | 0.71    |
| Cape Vincent | 0.02               | 0.02           | 0.60            | 0.65    |
| Cobourg      | 0.04               | 0.04           | 0.65            | 0.61    |
| Burlington   | 0.02               | 0.02           | 0.84            | 0.83    |
| Olcott       | 0.01               | 0.01           | 0.71            | 0.85    |
| Port Wellar  | 0.03               | 0.02           | 0.72            | 0.73    |
| Toronto      | 0.03               | 0.02           | 0.82            | 0.84    |
| Kingston     | 0.02               | 0.03           | 0.83            | 0.80    |

**Table S4:** Error statistics comparing Coastlines-LO and GLCFS results between November 30 – December 5, 2022.

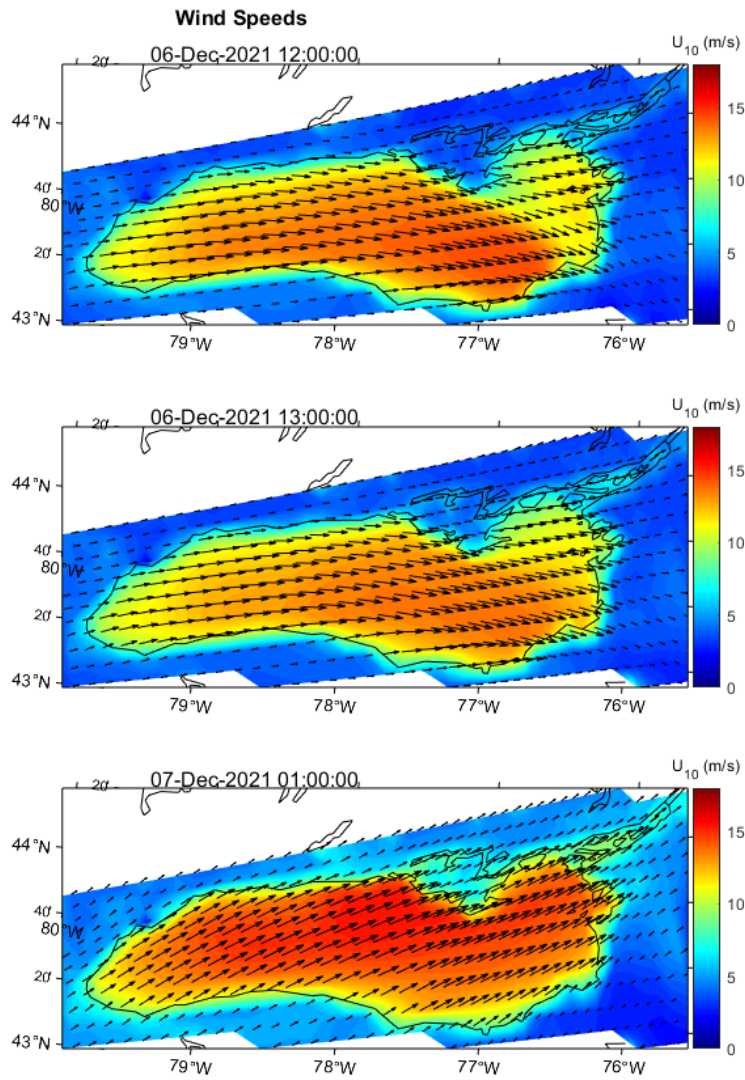

**Figure S4:** Maps of HRDPS wind forecasts shown at select times with every 5<sup>th</sup> vector plotted for clarity.
